# Supplementary material for: Role of Local and Electronic Structural Changes with Partially Anion substitution Lithium Manganese Spinel Oxides on Their Electrochemical Properties: X-ray Absorption Spectroscopy Study
Source: Royal Society of Chemistry journal article supplement (doi:10.1039/c1dt10612k), 2011-01-01
Supplement: c1dt10612k.pdf [file c1dt10612k.pdf]

*Supporting Information*

**Role of Local and Electronic Structural Changes with Partially Anion substitution**

**Lithium Manganese Spinel Oxides on Their Electrochemical Properties:**

**X-ray Absorption Spectroscopy Study**

Toyoki Okumura,<sup>a</sup> Tomokazu Fukutsuka,<sup>b</sup> Keisuke Matsumoto,<sup>a</sup> Yuki Orikasa,<sup>c</sup> Hajime Arai,<sup>c</sup>  
Zempachi Ogumi<sup>c</sup> and Yoshiharu Uchimoto<sup>a</sup>

<sup>a</sup> *Department of Interdisciplinary Environment, Graduate School of Human and Environmental Studies, Kyoto University, Yoshida-nihonmatsu-cho, Sakyo-ku, Kyoto 606-8501, Japan*

<sup>b</sup> *Department of Interdisciplinary Environment, Graduate School of Engineering, Kyoto University, Nishikyo-ku, Kyoto 615-8510, Japan*

<sup>c</sup> *Society-Academia Collaboration for Innovation, Kyoto University, Nishikyo-ku, Kyoto 615-8510, Japan*

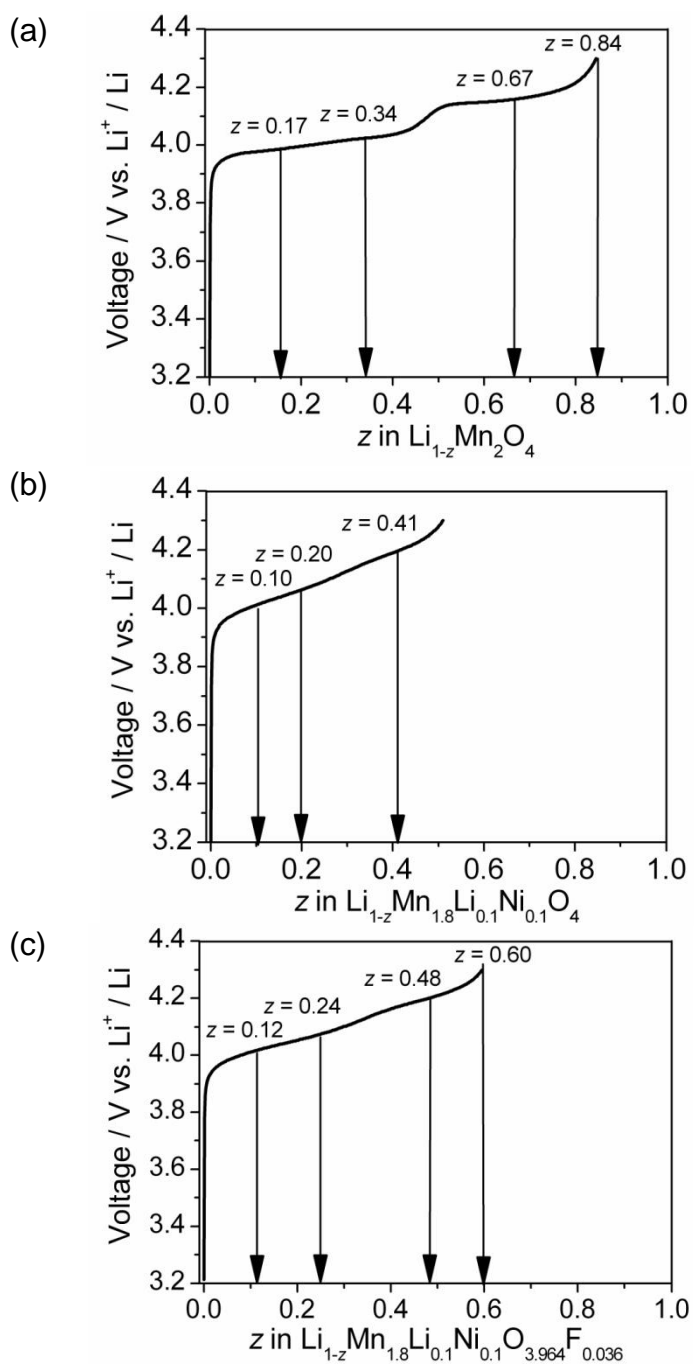

Figure S1 Electrochemical discharge profiles of  $\text{Li}_{1-z}\text{Mn}_2\text{O}_4$  (a),  $\text{Li}_{1-z}\text{Mn}_{1.8}\text{Li}_{0.1}\text{Ni}_{0.1}\text{O}_4$  (b) and  $\text{Li}_{1-z}\text{Mn}_{1.8}\text{Li}_{0.1}\text{Ni}_{0.1}\text{O}_{3.964}\text{F}_{0.036}$  (c) by a galvanostatic method (C rate: 1/12 C). The arrows indicate the samples for the XAFS measurements.

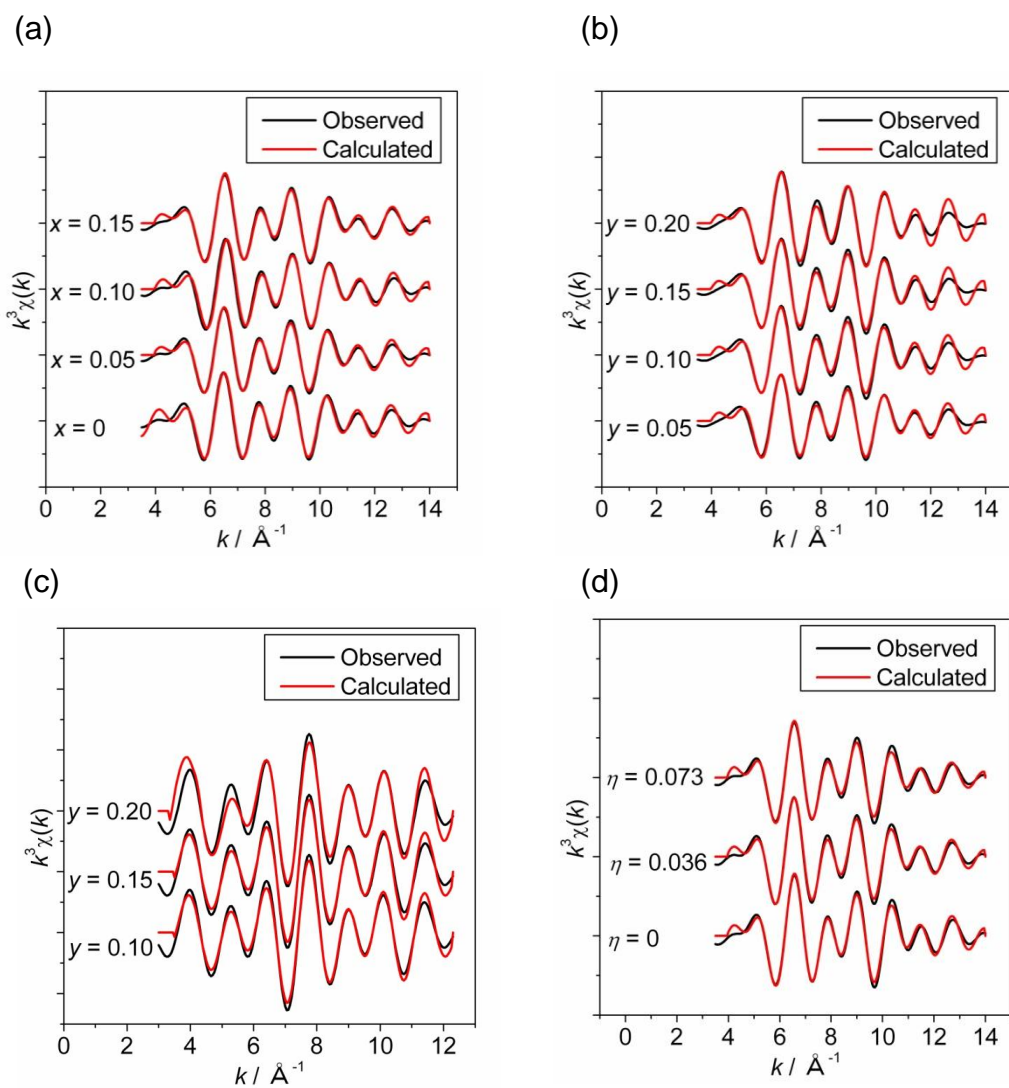

Figure S2 Curve-fitting results for inverse FT Mn K-edge EXAFS spectra of  $\text{LiMn}_{2-x}\text{Li}_x\text{O}_4$  ( $x = 0, 0.05, 0.10, 0.15$ ) (a),  $\text{LiMn}_{1.9-y}\text{Li}_{0.1}\text{Ni}_y\text{O}_4$  ( $y = 0.05, 0.10, 0.15, 0.20$ ) (b),  $\text{LiMn}_{1.8}\text{Li}_{0.1}\text{Ni}_{0.1}\text{O}_{4-\eta}\text{F}_\eta$  ( $\eta = 0, 0.036, 0.073$ ) (d), and inverse FT Ni K-edge EXAFS spectra of  $\text{LiMn}_{1.9-y}\text{Li}_{0.1}\text{Ni}_y\text{O}_4$  ( $y = 0.10, 0.15, 0.20$ ) (c).

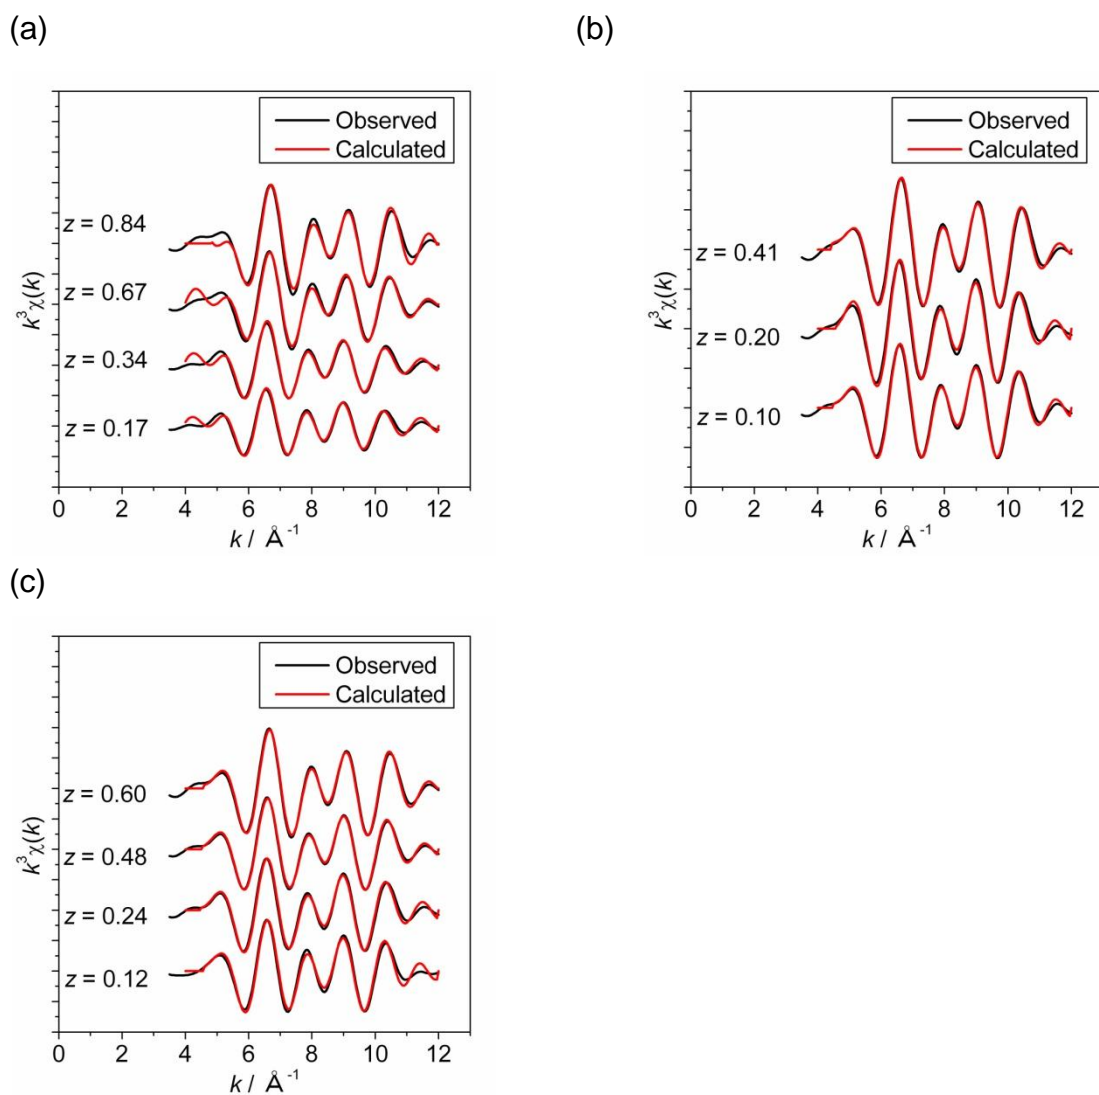

Figure S3 Curve-fitting results for inverse FT Mn K-edge EXAFS spectra of  $\text{Li}_{1-z}\text{Mn}_2\text{O}_4$  (a),  $\text{Li}_{1-z}\text{Mn}_{1.8}\text{Li}_{0.1}\text{Ni}_{0.1}\text{O}_4$  (b) and  $\text{Li}_{1-z}\text{Mn}_{1.8}\text{Li}_{0.1}\text{Ni}_{0.1}\text{O}_{3.964}\text{F}_{0.036}$  (c).

Table S1 Calculated parameters estimated from Mn K-edge EXAFS spectra for  $\text{LiMn}_{2-x}\text{Li}_x\text{O}_4$  ( $x = 0, 0.05, 0.10, 0.15$ ) (a),  $\text{LiMn}_{1.9-y}\text{Li}_{0.1}\text{Ni}_y\text{O}_4$  ( $y = 0.05, 0.10, 0.15, 0.20$ ) (b),  $\text{LiMn}_{1.8}\text{Li}_{0.1}\text{Ni}_{0.1}\text{O}_{4-\eta}\text{F}_\eta$  ( $\eta = 0, 0.036, 0.073$ ) (d), and Ni K-edge EXAFS spectra of  $\text{LiMn}_{1.9-y}\text{Li}_{0.1}\text{Ni}_y\text{O}_4$  ( $y = 0.10, 0.15, 0.20$ ) (c): interatomic distance ( $R$ ) and Debye Waller factor ( $\sigma$ ). Coordination number ( $CN$ ) was fixed at fitting

(a)

| $x$ in $\text{LiMn}_{2-x}\text{Li}_x\text{O}_4$ | Mn-O   |          |            | Mn-M   |          |            | Residue <sup>b</sup> / % |
|-------------------------------------------------|--------|----------|------------|--------|----------|------------|--------------------------|
|                                                 | $CN^a$ | $R /$    | $\sigma /$ | $CN^a$ | $R /$    | $\sigma /$ |                          |
| 0                                               | 6      | 1.926(8) | 0.087(13)  | 6      | 2.926(5) | 0.066(8)   | 3.493                    |
| 0.05                                            | 6      | 1.919(9) | 0.086(12)  | 6      | 2.918(5) | 0.068(8)   | 2.672                    |
| 0.1                                             | 6      | 1.917(9) | 0.083(13)  | 6      | 2.915(5) | 0.066(8)   | 4.562                    |
| 0.15                                            | 6      | 1.915(8) | 0.079(12)  | 6      | 2.911(5) | 0.068(8)   | 1.986                    |

<sup>a</sup> Fixed parameter for the curve-fitting procedure. <sup>b</sup> Residue =  $100\{\sum\{k^3\chi_{\text{obs}}(k)-k^3\chi_{\text{calc}}(k)\}^2\}/\sum\{k^3\chi_{\text{obs}}(k)\}^2$ .

(b)

| $y$ in $\text{LiMn}_{1.9-y}\text{Li}_{0.1}\text{Ni}_y\text{O}_4$ | Mn-O   |          |            | Mn-M   |          |            | Residue <sup>b</sup> / % |
|------------------------------------------------------------------|--------|----------|------------|--------|----------|------------|--------------------------|
|                                                                  | $CN^a$ | $R /$    | $\sigma /$ | $CN^a$ | $R /$    | $\sigma /$ |                          |
| 0.05                                                             | 6      | 1.915(9) | 0.083(13)  | 6      | 2.913(5) | 0.063(8)   | 3.852                    |
| 0.1                                                              | 6      | 1.913(8) | 0.080(13)  | 6      | 2.911(5) | 0.060(9)   | 4.398                    |
| 0.15                                                             | 6      | 1.911(9) | 0.079(13)  | 6      | 2.908(5) | 0.057(9)   | 4.836                    |
| 0.2                                                              | 6      | 1.910(9) | 0.075(13)  | 6      | 2.907(5) | 0.055(9)   | 4.392                    |

<sup>a</sup> Fixed parameter for the curve-fitting procedure. <sup>b</sup> Residue =  $100\{\sum\{k^3\chi_{\text{obs}}(k)-k^3\chi_{\text{calc}}(k)\}^2\}/\sum\{k^3\chi_{\text{obs}}(k)\}^2$ .

(c)

| $y$ in $\text{LiMn}_{1.9-y}\text{Li}_{0.1}\text{Ni}_y\text{O}_4$ | Ni-O   |           |            | Ni-M   |          |            | Residue <sup>b</sup> / % |
|------------------------------------------------------------------|--------|-----------|------------|--------|----------|------------|--------------------------|
|                                                                  | $CN^a$ | $R /$     | $\sigma /$ | $CN^a$ | $R /$    | $\sigma /$ |                          |
| 0.1                                                              | 6      | 2.064(10) | 0.067(19)  | 6      | 2.928(6) | 0.058(11)  | 1.930                    |
| 0.15                                                             | 6      | 2.064(11) | 0.067(19)  | 6      | 2.928(6) | 0.058(11)  | 2.104                    |
| 0.2                                                              | 6      | 2.064(10) | 0.067(19)  | 6      | 2.928(6) | 0.058(11)  | 1.691                    |

<sup>a</sup> Fixed parameter for the curve-fitting procedure. <sup>b</sup> Residue =  $100\{\sum\{k^3\chi_{\text{obs}}(k)-k^3\chi_{\text{calc}}(k)\}^2\}/\sum\{k^3\chi_{\text{obs}}(k)\}^2$ .

(d)

| $\eta$ in $\text{LiMn}_{1.8}\text{Li}_{0.1}\text{Ni}_{0.1}\text{O}_{4-\eta}\text{F}_\eta$ | Mn-O   |          |            | Mn-M   |          |            | Residue <sup>b</sup> / % |
|-------------------------------------------------------------------------------------------|--------|----------|------------|--------|----------|------------|--------------------------|
|                                                                                           | $CN^a$ | $R /$    | $\sigma /$ | $CN^a$ | $R /$    | $\sigma /$ |                          |
| 0                                                                                         | 6      | 1.908(8) | 0.082(12)  | 6      | 2.903(5) | 0.069(8)   | 2.020                    |
| 0.036                                                                                     | 6      | 1.910(9) | 0.086(12)  | 6      | 2.905(5) | 0.072(8)   | 1.906                    |
| 0.073                                                                                     | 6      | 1.912(8) | 0.088(12)  | 6      | 2.907(5) | 0.075(8)   | 2.830                    |

<sup>a</sup> Fixed parameter for the curve-fitting procedure. <sup>b</sup> Residue =  $100\{\sum\{k^3\chi_{\text{obs}}(k)-k^3\chi_{\text{calc}}(k)\}^2\}/\sum\{k^3\chi_{\text{obs}}(k)\}^2$ .

Table S2 Calculated parameters estimated from Mn K-edge EXAFS spectra for  $\text{Li}_{1-z}\text{Mn}_2\text{O}_4$  (a),  $\text{Li}_{1-z}\text{Mn}_{1.8}\text{Li}_{0.1}\text{Ni}_{0.1}\text{O}_4$  (b) and  $\text{Li}_{1-z}\text{Mn}_{1.8}\text{Li}_{0.1}\text{Ni}_{0.1}\text{O}_{3.964}\text{F}_{0.036}$  (c): interatomic distance ( $R$ ) and Debye Waller factor ( $\sigma$ ). Coordination number ( $CN$ ) was fixed at fitting

(a)

| $z$ in $\text{Li}_{1-z}\text{Mn}_2\text{O}_4$ | Mn-O   |           |            | Mn-M   |          |            | Residue <sup>b</sup> / % |
|-----------------------------------------------|--------|-----------|------------|--------|----------|------------|--------------------------|
|                                               | $CN^a$ | $R /$     | $\sigma /$ | $CN^a$ | $R /$    | $\sigma /$ |                          |
| 0.17                                          | 6      | 1.932(11) | 0.099(16)  | 6      | 2.922(6) | 0.081(9)   | 4.200                    |
| 0.34                                          | 6      | 1.930(9)  | 0.096(14)  | 6      | 2.919(6) | 0.077(9)   | 4.331                    |
| 0.67                                          | 6      | 1.923(8)  | 0.072(15)  | 6      | 2.889(6) | 0.059(11)  | 4.119                    |
| 0.84                                          | 6      | 1.914(9)  | 0.067(16)  | 6      | 2.874(6) | 0.057(12)  | 3.928                    |

<sup>a</sup> Fixed parameter for the curve-fitting procedure. <sup>b</sup> Residue =  $100\{\sum\{k^3\chi_{\text{obs}}(k)-k^3\chi_{\text{calc}}(k)\}^2\}/\sum\{k^3\chi_{\text{obs}}(k)\}^2$ .

(b)

| $z$ in $\text{Li}_{1-z}\text{Mn}_{1.8}\text{Li}_{0.1}\text{Ni}_{0.1}\text{O}_4$ | Mn-O   |          |            | Mn-M   |          |            | Residue <sup>b</sup> / % |
|---------------------------------------------------------------------------------|--------|----------|------------|--------|----------|------------|--------------------------|
|                                                                                 | $CN^a$ | $R /$    | $\sigma /$ | $CN^a$ | $R /$    | $\sigma /$ |                          |
| 0.10                                                                            | 6      | 1.924(9) | 0.079(15)  | 6      | 2.918(6) | 0.061(11)  | 1.463                    |
| 0.20                                                                            | 6      | 1.918(9) | 0.076(15)  | 6      | 2.915(6) | 0.060(11)  | 2.415                    |
| 0.41                                                                            | 6      | 1.904(9) | 0.070(15)  | 6      | 2.906(6) | 0.057(11)  | 1.336                    |

<sup>a</sup> Fixed parameter for the curve-fitting procedure. <sup>b</sup> Residue =  $100\{\sum\{k^3\chi_{\text{obs}}(k)-k^3\chi_{\text{calc}}(k)\}^2\}/\sum\{k^3\chi_{\text{obs}}(k)\}^2$ .

(c)

| $z$ in $\text{Li}_{1-z}\text{Mn}_{1.8}\text{Li}_{0.1}\text{Ni}_{0.1}\text{O}_{3.964}\text{F}_{0.036}$ | Mn-O   |           |            | Mn-M   |          |            | Residue <sup>b</sup> / % |
|-------------------------------------------------------------------------------------------------------|--------|-----------|------------|--------|----------|------------|--------------------------|
|                                                                                                       | $CN^a$ | $R /$     | $\sigma /$ | $CN^a$ | $R /$    | $\sigma /$ |                          |
| 0.12                                                                                                  | 6      | 1.921(10) | 0.077(15)  | 6      | 2.921(6) | 0.063(11)  | 3.290                    |
| 0.24                                                                                                  | 6      | 1.919(9)  | 0.075(15)  | 6      | 2.919(6) | 0.061(11)  | 1.881                    |
| 0.48                                                                                                  | 6      | 1.915(9)  | 0.070(15)  | 6      | 2.900(6) | 0.058(12)  | 0.652                    |
| 0.60                                                                                                  | 6      | 1.911(9)  | 0.067(16)  | 6      | 2.886(6) | 0.053(12)  | 0.950                    |

<sup>a</sup> Fixed parameter for the curve-fitting procedure. <sup>b</sup> Residue =  $100\{\sum\{k^3\chi_{\text{obs}}(k)-k^3\chi_{\text{calc}}(k)\}^2\}/\sum\{k^3\chi_{\text{obs}}(k)\}^2$ .
